# Supplementary material
Source: PubMed Central journal article supplement (PMC7512165)
Supplement: JCM.00903-20-s0001.pdf [file JCM.00903-20-s0001.pdf]

**Supplementary Table 1** The stages of each type of focal brucellosis.

| <b>Focal Involvement</b>           | <b>Acute</b><br>(n=142) | <b>Subacute</b><br>(n=90) | <b>Chronic</b><br>(n=53) | <b>P value</b>     |
|------------------------------------|-------------------------|---------------------------|--------------------------|--------------------|
| <b>Neurobrucellosis</b>            | 1(0.70)                 | 2(2.22)                   | 3(5.66)                  | 0.083              |
| <b>Osteoarthritis</b>              | 23(16.20)               | 24(26.67)                 | 21(39.62)                | 0.002 <sup>a</sup> |
| <b>Bronchitis and/or pneumonia</b> | 11(7.75)                | 6(6.67)                   | 0                        | 0.120              |
| <b>Genital infection</b>           | 13(9.15)                | 4(4.44)                   | 0                        | 0.035 <sup>b</sup> |
| <b>Endocarditis</b>                | 1(0.70)                 | 2(2.22)                   | 0                        | 0.385              |
| <b>None</b>                        | 93(65.49)               | 52(57.78)                 | 29(54.72)                | 0.290              |

Data are no. (%) of cases, unless otherwise indicated.

<sup>a</sup>Percentages of cases with each stage were compared with a Chi-square test. There are significant adjusted differences in osteoarthritis between acute and chronic cases.

<sup>b</sup>Percentages of cases with each stage were compared with a Fisher's exact test. There are significant adjusted differences in Genital infection between acute and chronic cases.

**Supplementary Table 2** Results of ELISA performed on 285 brucellosis patients

|                             | <b>Negative</b> | <b>Positive</b> |
|-----------------------------|-----------------|-----------------|
|                             | <b>N (%)</b>    | <b>N (%)</b>    |
| <b>ELISAA-IgM</b>           | 110(38.60)      | 175(61.40)      |
| <b>ELISA-IgG</b>            | 11(3.86)        | 274(96.14)      |
| <b>ELISA-IgM and/or IgG</b> | 3(1.05)         | 282(98.95)      |

<sup>a</sup>ELISA, enzyme-linked immunosorbent assay
